# Supplementary material
Source: publisher figshare collection journal article supplement (https://acs.figshare.com/ndownloader/files/3952726)
Supplement: Supplementary file 1 [file 3952726]

# **Supplementary Information**

**Solvothermal-induced 3D Macroscopic SnO<sub>2</sub>/Nitrogen-doped**

**Graphene Aerogels for High Capacity and Long-life Lithium Storage**

Ronghua Wang, Chaohe Xu, Jing Sun \*, Lian Gao and Heliang Yao

E-mail: [jingsun@mail.sic.ac.cn](mailto:jingsun@mail.sic.ac.cn)

Tel: +86 21 52414301. Fax: +86 21 52413122.

The State Key Lab of High Performance Ceramics and Superfine Microstructure,  
Shanghai Institute of Ceramics, Chinese Academy of Sciences, 1295 Ding Xi Road,  
Shanghai 200050

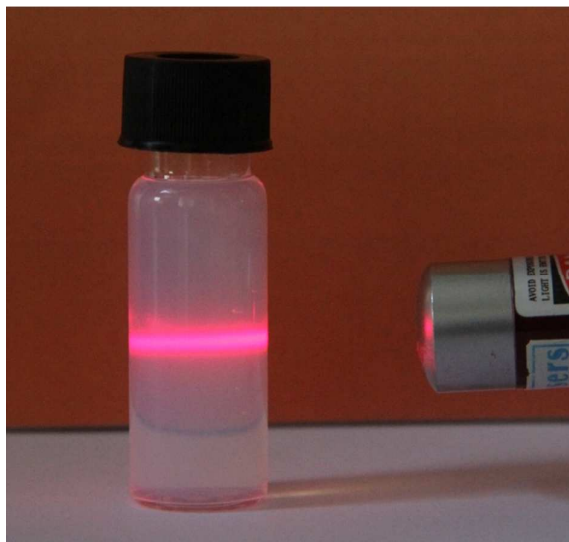

**Figure S1.** A photograph of SnO<sub>2</sub> dispersion. The tyndall effect confirms the colloidal nature of the SnO<sub>2</sub> dispersions.

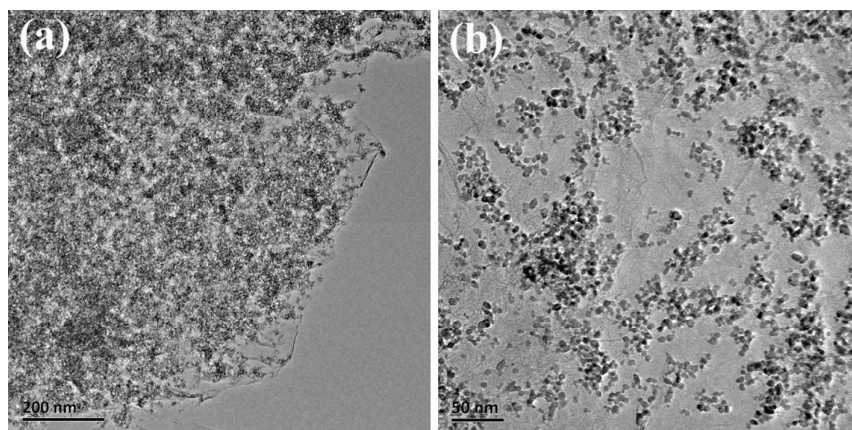

**Figure S2.** TEM images of SnO<sub>2</sub>/GO.

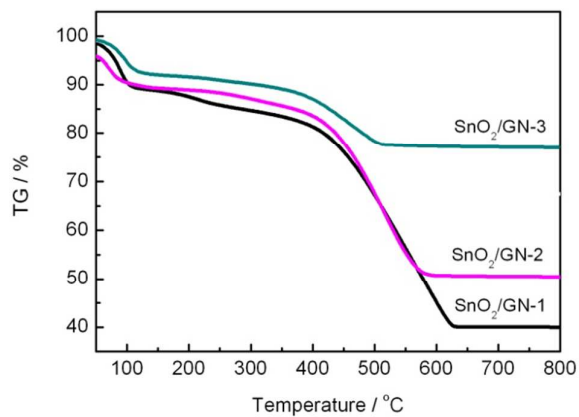

**Figure S3.** TG curves of SnO<sub>2</sub>/GN. The weight contents of GN and SnO<sub>2</sub> are calculated by getting rid of the weight loss of adsorption water.

For SnO<sub>2</sub>/GN-1:

$$C_{GN} = 1 - \frac{C_{SnO_2}}{1 - C_{H_2O}} = 1 - \frac{0.4002}{1 - 0.0953} = 55.76\%$$

For SnO<sub>2</sub>/GN-2:

$$C_{GN} = 1 - \frac{C_{SnO_2}}{1 - C_{H_2O}} = 1 - \frac{0.5043}{1 - 0.0957} = 44.23\%$$

For SnO<sub>2</sub>/GN-3:

$$C_{GN} = 1 - \frac{C_{SnO_2}}{1 - C_{H_2O}} = 1 - \frac{0.7700}{1 - 0.0538} = 18.62\%$$

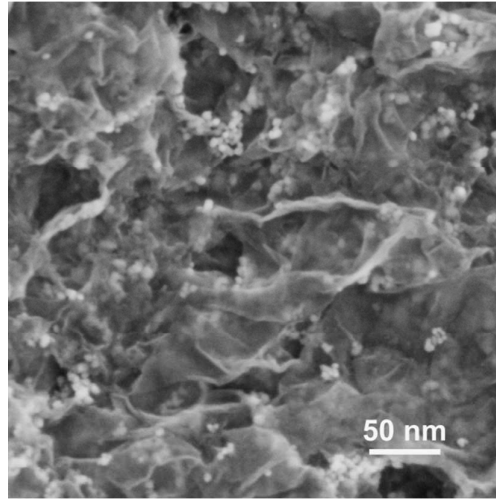

**Figure S4.** A high-magnified SEM image of SnO<sub>2</sub>/GN-2. As it shows, SnO<sub>2</sub> nanoparticles, with an ultra-small size of 3-7 nm, were uniformly dispersed within the hybrid.

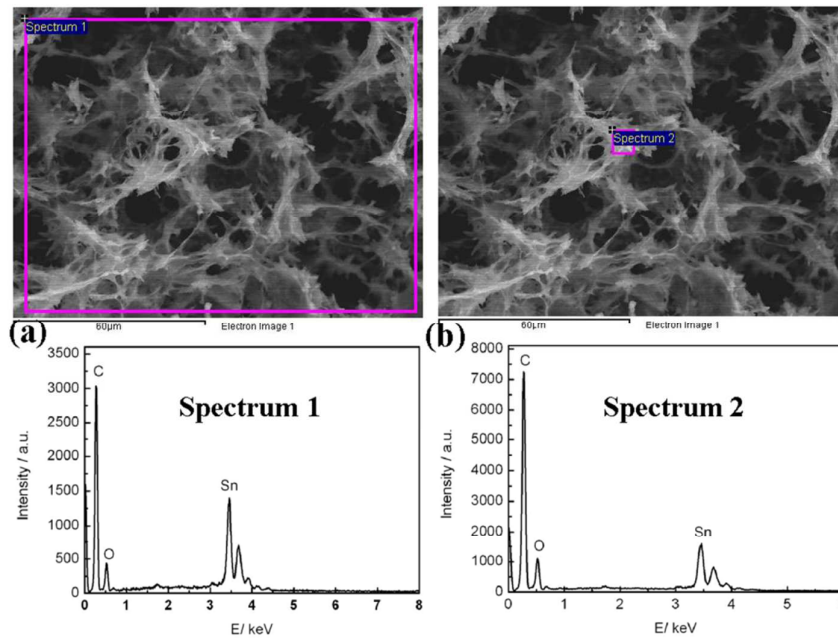

**Figure S5.** EDS spectra of  $\text{SnO}_2/\text{GS-2}$  aerogel in different regions. The chemical composition verified by EDS can confirm the existence of  $\text{SnO}_2$ .

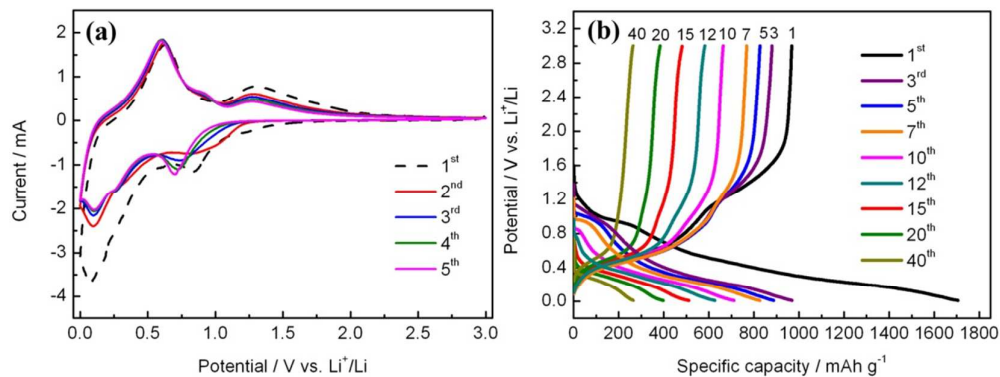

**Figure S6.** (a) Cyclic voltammograms for the first five cycles of pure  $\text{SnO}_2$  electrode;  
(b) charge-discharge profiles of pure  $\text{SnO}_2$  electrode at a current density of  $500 \text{ mA g}^{-1}$ .

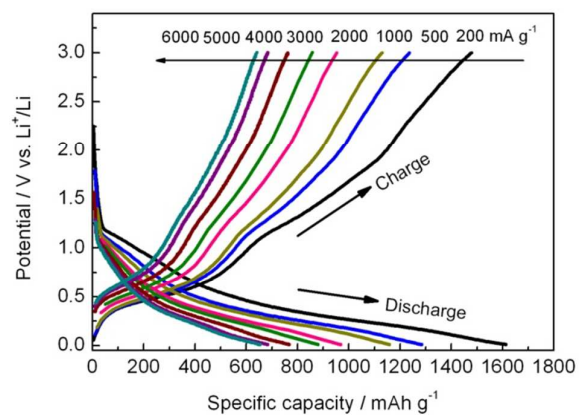

**Figure S7.** The charge/discharge curves of SnO<sub>2</sub>/GN-2 at various current densities.

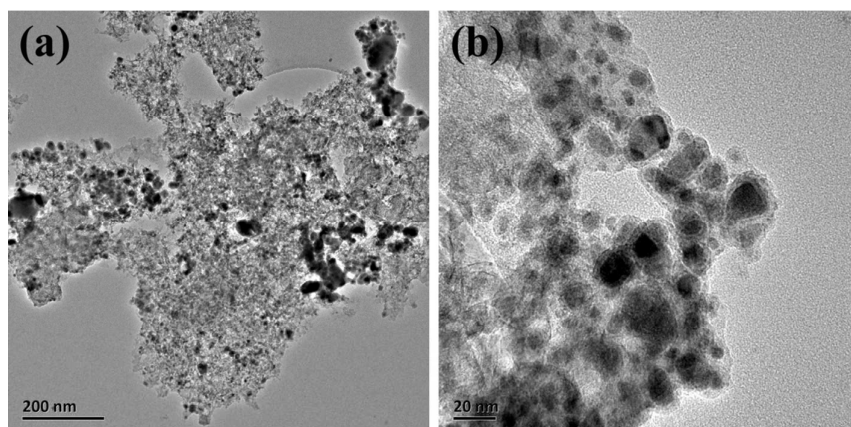

**Figure S8.** TEM images of pure SnO<sub>2</sub> electrode after cycling at 500 mA g<sup>-1</sup>.

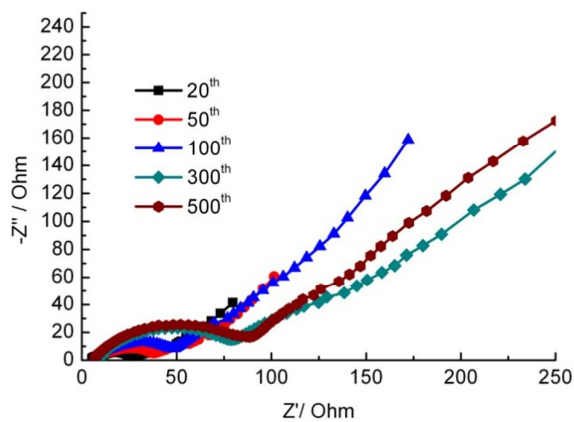

**Figure S9.** Nyquist plots of pure SnO<sub>2</sub> electrode after specific cycles.

**Table S1.** EIS fitting results of SnO<sub>2</sub>/GN electrode after specific cycles.

| Cycles            | Rs    | CPE1-T    | CPE1-P | R <sub>SEI</sub> | CPE2-T   | CPE2-P | R <sub>ct</sub> |
|-------------------|-------|-----------|--------|------------------|----------|--------|-----------------|
| 20 <sup>th</sup>  | 6.059 | 0.0003355 | 0.5866 | 16.75            | 0.008287 | 0.7458 | 8.087           |
| 50 <sup>th</sup>  | 5.829 | 0.0003231 | 0.5837 | 18.50            | 0.005880 | 0.7590 | 10.77           |
| 100 <sup>th</sup> | 6.301 | 0.0002272 | 0.6173 | 17.58            | 0.005779 | 0.7567 | 9.247           |
| 300 <sup>th</sup> | 5.202 | 0.0004779 | 0.5311 | 15.66            | 0.007696 | 0.6877 | 9.419           |
| 500 <sup>th</sup> | 4.705 | 0.0006103 | 0.5299 | 12.82            | 0.006613 | 0.7835 | 7.684           |
